# Supplementary material
Source: Springer Nature journal article supplement (https://www.springermedizin.de/resource/supplementary/12985_2010_1039_MOESM3_ESM.pdf/9609012)
Supplement: MOESM3 [file 9609012]

BKV\_2.1 (f) 5'-CCCAGGAGGTGCTAATCAAAGA-3'  
Polyoma 4.2 (f) 5'-GCTCCTCAATGGATGTTGCCT-3'  
BKV-MGB Probe 5'-(6FAM)-CCGTACAGGCCTAGAA-(MGB-NFQ)-3'  
BKV\_4.1 (r) 5'-TCAIATGCTTCAAGAGCAGGTGT-3'

1 30 60 90 120  
NC\_007611.1|1347-1589| SA12 TCAGGTGAATTTATAGAAAAAAGTCTAGCACCAGGAGGTGCCAATCAAAGAATTGCTCCTCAATGGATGTTGCCTTTGCTTCTAGGCCTGTACGGGACTGTAACACCTGCTCTTGAAGCATATGAAGATG  
NC\_001669.1|1378-1620| SV40 TCAGGTGAATTTATTGAAAAATTTGAGGCTCCTGGTGGTGCAAAATCAAAGAAGTCTGCTCCTCAGTGGATGTTGCCTTTACTTCTAGGCCTGTACGGGACTGTAACACCTGCTCTTGAAGCATATGAAGATG  
NC\_001699.1|1342-1560| JCV TCTGGTGAATTTATAGAAAGAAGTATTGCACCAGGAGGTGCAAAATCAAAGATCTGCTCCTCAATGGATGTTGCCTTTACTTTTAGGGTTGTACGGGACTGTAACACCTGCTCTTGAAGCATATGAAGATG  
.....G.CC.....G.A..ACY.A..G.G.....AG.....GG...A.....A.....T.....C.....G.....  
NC\_001538.1|1437-1679| BKV TCAGGAGAGTTTATAGAAAAAAGTATTGCCAGGAGGTGCTAATCAAAGAAGTCTGCTCCTCAATGGATGTTGCCTTTACTTCTAGGCCTGTACGGGACTGTAACACCTGCTCTTGAAGCATATGAAGATG  
.....G.....  
.....G.....  
.....G.....  
.....A.....  
.....G.....

BKV\_5.1 (r) 5'-CTGCCCTGGACACTCTC-3'

150 180 210 240  
NC\_007611.1|1347-1589| SA12 CCCCCAGCAAAAAGAAAAGGAGAATGTCCAGGGGCAGCTCCCAAAAAGCCAAAGGACCCCGTGCGAGTTCCTTATAAGAGGAGGCGTAGAAGTACTAGAAGTTAA  
NC\_001669.1|1378-1620| SV40 GCCCCAACAAAAAGAAAAGGAGTGTCCAGGGGCAGCTCCCAAAAAGCCAAAGGAAACCAGTGCAGTGCCTCAAAAAGCTCGTCATAAAAAGGAGGAATAGAAGTCTAGGAGTTAA  
NC\_001699.1|1342-1560| JCV GCCCCAACAAAAAGAAAAGGAGAAAAG-----GAAGGACCCCGTCAAGTTCCTTATAAGAGGAGGAGTAGAAGTCTAGGAGTTAA  
.....C...G.....C.....-----...C.T...C..G.....A.....GT.....  
NC\_001538.1|1437-1679| BKV GCCCCAACAAAAAGAAAAGGAGAGTGTCCAGGGGCAGCTCCCAAAAAGCCAAAGGAAACCAGTGCAGTGCCTCAAAAAGTACTAATAAAAAGGAGGAGTAGAAGTCTAGGAGTTAA  
..... [56/271]  
..... [73/271]  
.....C..... [87/271]  
.....C..... [7/271]  
.....A..... [1/271]  
.....A..... [38/271]  
.....A.....G..... [6/271]  
.....A...A..... [1/271]  
.....A.....A..... [1/271]  
.....A.....G..... [1/271]  
.....A..... [1/271]  
.....G..... [1/271]  
.....G..... [1/271]  
.....G..... [1/271]
